# Supplementary material
Source: MDPI journal article supplement (https://www.mdpi.com/2079-6412/13/3/494)
Supplement: s1 [file s1]

# SUPPLEMENTARY MATERIALS

## **Ciprofloxacin-Loaded Composite Granules Enriched in Silver and Gallium Ions—Physicochemical Properties and Antimicrobial Activity**

**Kamil Pajor <sup>1</sup>, Łukasz Pajchel <sup>1</sup>, Anna Zgadzaj <sup>2</sup>, Paulina Kowalska <sup>1</sup>, Anna Kowalczyk <sup>3</sup> and Joanna Kolmas <sup>1,\*</sup>**

<sup>1</sup> Department of Analytical Chemistry, Chair of Analytical Chemistry and Biomaterials, Medical University of Warsaw, Faculty of Pharmacy, ul. Banacha 1, 02-097, Warsaw, Poland <sup>2</sup>

Department of Environmental Health Sciences, Medical University of Warsaw, Faculty of Pharmacy, ul. Banacha 1, 02-097, Warsaw, Poland

<sup>3</sup> National Medicines Institute (NIL), Chelmska 30/34, 00-725 Warszawa, Poland

\* Correspondence: joanna.kolmas@wum.edu.pl

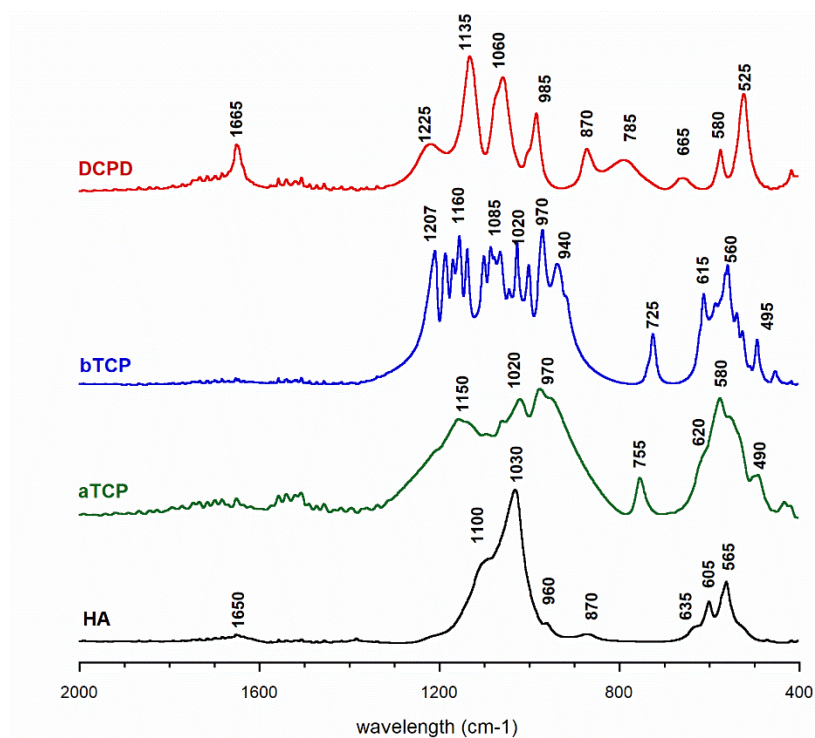

**Figure S1.** FT-IR spectra of the unsubstituted calcium phosphates.

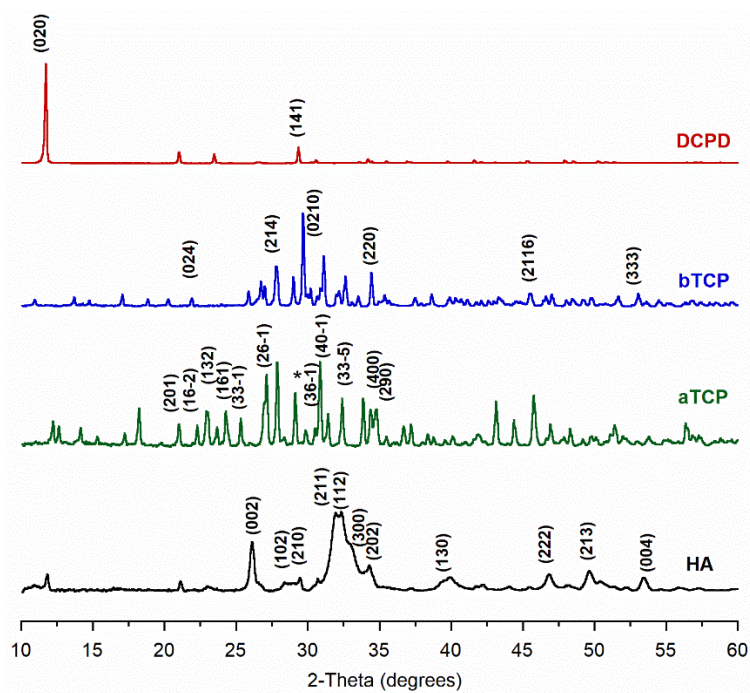

**Figure S2.** PXRD diffractograms of the unsubstituted calcium phosphates.

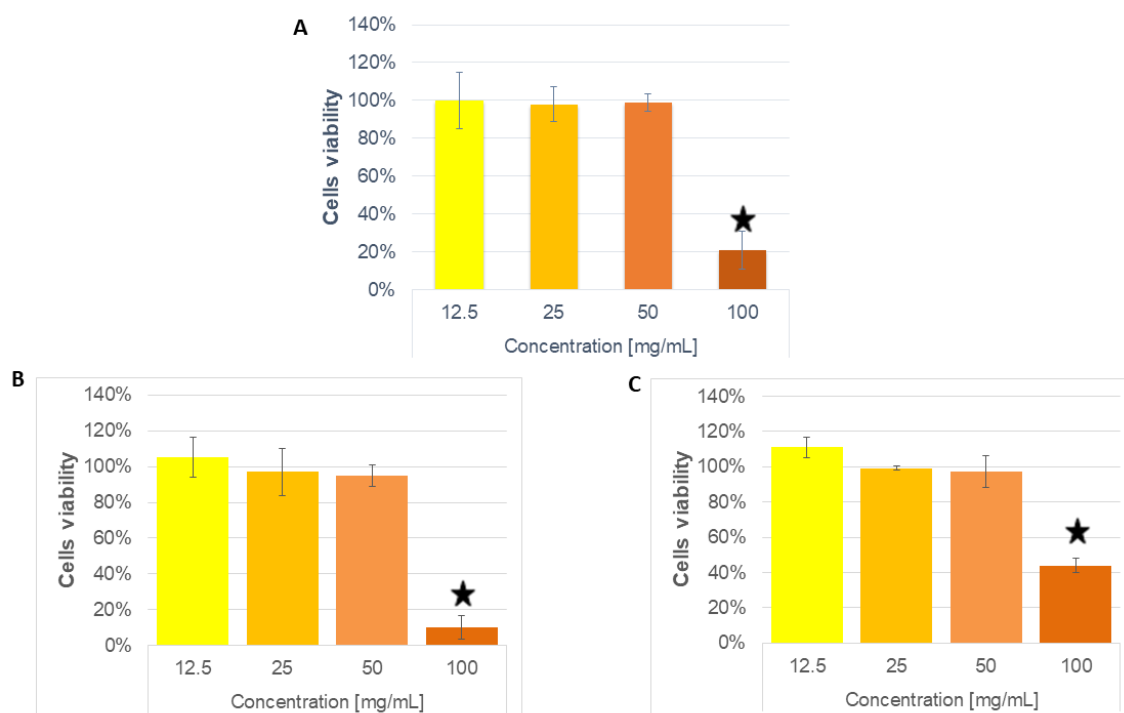

**Figure S3.** The NRU test results obtained for samples Ag-DCPD (A), G1 (B), and G2 (C) in the whole range of tested concentrations. Black stars indicate a decrease in cell viability under 70%, which classified each of these samples as cytotoxic. The rest of the tested materials did not reveal cytotoxicity in the whole range of tested dilutions.

**A**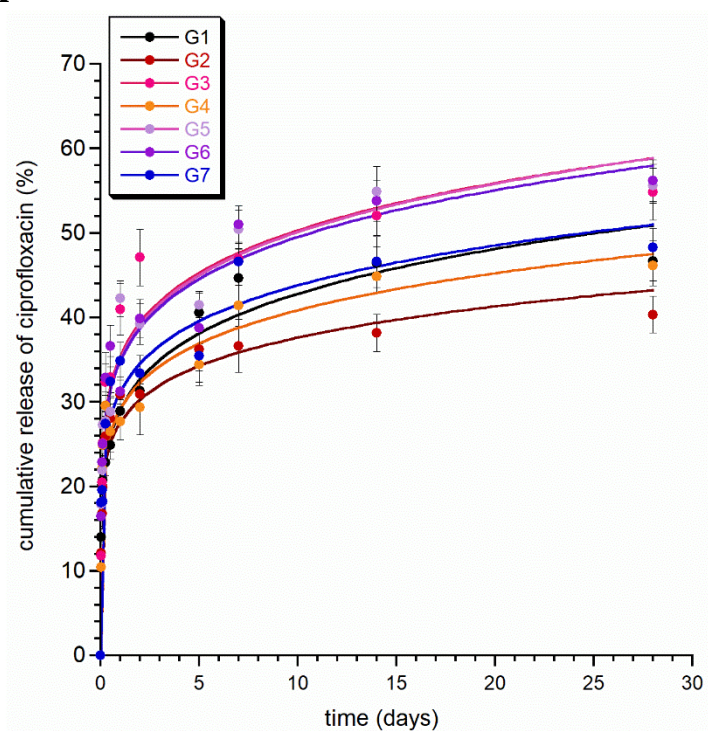**B**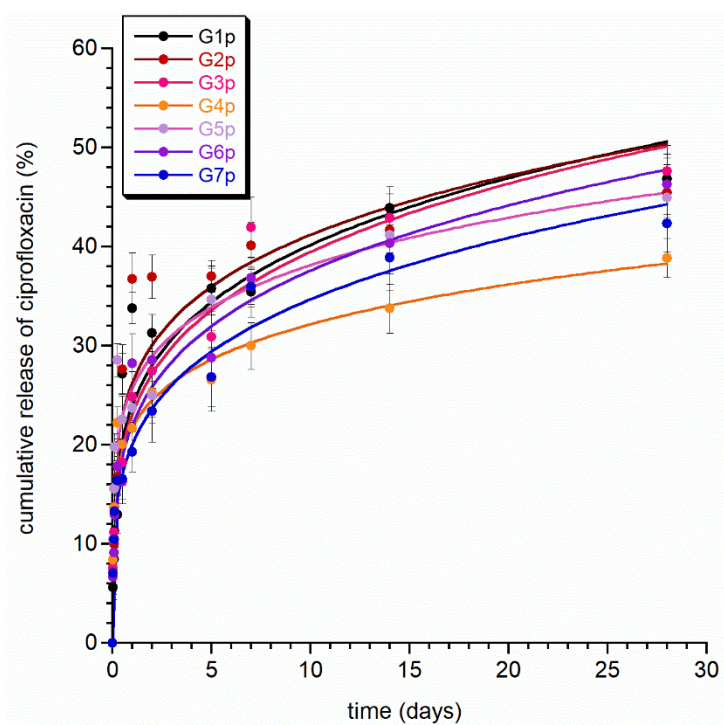

**Figure S4.** Cumulative release of ciprofloxacin (%) – fitting curves. A – the composite without PCL; B the composite coated with PCL.
